# Subscribe to Psychiatric Services today!

## Don't miss the March issue:

- Improving medication adherence with telemedicine
- Mental health self-directed care financing
- Custody issues for parents with serious mental illness

## Coming in the April issue:

- Effect of ACA on uninsured rates of people with mental and substance use disorders
- Review: ethical considerations of searching online for patient information
- The opioid crisis: establishing sanctioned safe consumption sites

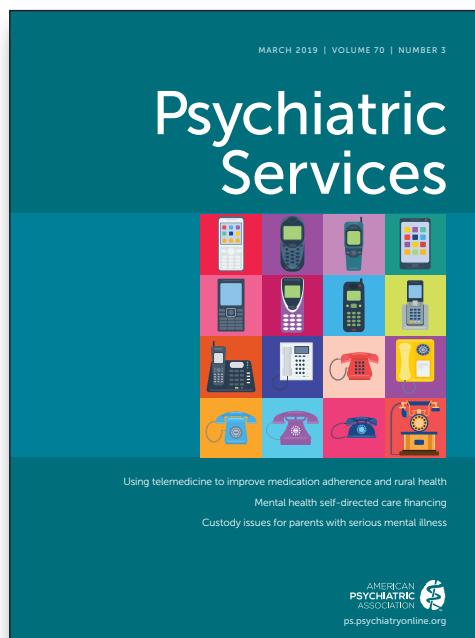

## One low price covers your print and online subscription.

\$ 126 APA Member print and online subscription

\$ 115 APA Member online-only subscription

## Now Available:

**Editor's Choice**—Sign up to receive monthly Publication Alerts on curated, topical content: integrated care, recovery, peer services, and more.

<http://appi.org/etocs>

**PSYCHIATRIC  
SERVICES**

FROM PAGES  
TO PRACTICE

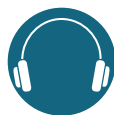

## Listen to our podcast

*Episode 20:*

Benzodiazepines  
Child Protective Services  
Self-Directed Care Financing

[ps.psychiatryonline.org](http://ps.psychiatryonline.org)

Subscribe today at [www.appi.org](http://www.appi.org) or call  
Customer Service at 1-800-368-5777.

AMERICAN  
PSYCHIATRIC  
ASSOCIATION  
PUBLISHING

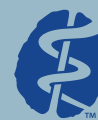

[www.appi.org](http://www.appi.org)

Priority Code AH1901MAR

## Subscription and Business Information

*The American Journal of Psychiatry*, ISSN 0002-953X, is published monthly by the American Psychiatric Association.

The American Psychiatric Association does not hold itself responsible for statements made in its publications by contributors or advertisers. Unless so stated, material in *The American Journal of Psychiatry* does not reflect the endorsement, official attitude, or position of the American Psychiatric Association or of the Journal's Editorial Board.

Periodicals postage paid at Washington, DC, and additional mailing offices. POSTMASTER: Send address changes to *The American Journal of Psychiatry*, Circulation Department, American Psychiatric Association, 800 Maine Avenue, S.W., Suite 900, Washington, D.C. 20024.

### Editorial Office

*American Journal of Psychiatry*  
American Psychiatric Association  
800 Maine Avenue, S.W., Suite 900  
Washington, D.C. 20024  
E-mail: [ajp@psych.org](mailto:ajp@psych.org)

### Customer Service

Phone: (800) 368-5777 (toll-free)  
E-mail: [appi@psych.org](mailto:appi@psych.org)

### APA Member Subscription Services

Phone: (888) 35-PSYCH (toll-free)

### Subscriptions

Per year: individual \$348.00,  
international \$523.00

Institutional subscriptions are tier priced. For institutional site license or pricing information, contact (202) 559-3729 or [institutions@psych.org](mailto:institutions@psych.org).

*Additional subscription options, including single issues and student rates*  
Contact Customer Service

### Advertising

*Pharmaceutical Print and Online Advertising*  
Frank Cox, Kathleen Harrison, Tim Wolfinger  
Pharmaceutical Media, Inc.  
30 East 33rd Street  
New York, NY 10016  
Phone: (212) 904-0379  
E-mail: [twolfinger@pminy.com](mailto:twolfinger@pminy.com)

### *Nonpharmaceutical and Online Sales*

Eamon Wood  
Pharmaceutical Media, Inc.  
E-mail: [ewood@pminy.com](mailto:ewood@pminy.com)  
(see address and phone above).

### Permissions and Reprints

Material published in the journals of the American Psychiatric Association and American Psychiatric Association Publishing is protected by copyright and all rights are reserved. Material may not be reproduced in any form or by any means without written permission from the copyright owner. For permission to reproduce material published by APA, please visit <http://www.appi.org/customer-service/permissions> for more information. Permission can also be secured through the Copyright Clearance Center ([www.copyright.com](http://www.copyright.com)).

APA does not require that permission be obtained for the photocopying of isolated articles for nonprofit classroom or library reserve use; all fees associated with such permission are waived. This consent does not extend to other kinds of copying, such as copying for general distribution, for advertising or promotional purposes, for creating new collective works, or for resale. Requests for commercial distribution should be directed to (202) 609-7075.

For bulk reprints, please contact Jane Cha, (202) 609-7075; e-mail: [jcha@psych.org](mailto:jcha@psych.org).

Indexed in Abstracts for Social Workers, Academic Abstracts, Biological Abstracts, Chemical Abstracts, Chicago Psychoanalytic Literature Index, Cumulative Index to Nursing Literature, Excerpta Medica, Hospital Literature Index, Index Medicus, International Nursing Index, Nutrition Abstracts, Psychological Abstracts, Science Citation Index, Social Science Source, and Social Sciences Index.

Pages are produced by Sheridan Journal Services (Waterbury, VT) and printed by Sheridan NH (Hanover, NH) on acid-free paper effective with Volume 169, Number 1, January 2012.

© 2019 American Psychiatric Association.

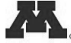

UNIVERSITY OF MINNESOTA  
The University of Minnesota, Twin Cities (UMTC)

The Department of Psychiatry & Behavioral Science at the University of Minnesota Medical School is seeking a psychiatrist to join the faculty and serve in a full-time, academic-track position as the Physician Chief for the M Health Fairview Behavioral Health Service Line, our major clinical medical center partner. For appropriately qualified candidates, there is also the potential for a Vice-Chair role within the Department in conjunction with this position.

#### About the Department

The Department of Psychiatry and Behavioral Sciences has undergone new leadership and is now embarked on a healthy pattern of growth and cutting-edge initiatives, with particular strengths in translational psychiatric neuroscience research and in developing state-of-the-art models of integrating transformative research developments within clinical programs. The Chair is committed to supporting productive and fulfilling career trajectories for all faculty, fostering a culture where people with diverse backgrounds and interests contribute to our collective success, and creating a healthy academic community where department members can thrive.

The Department offers courses and clerkships in all four years of the Medical School, as well as a General Psychiatry Residency, a Child and Adolescent Fellowship, a Psychosomatics Fellowship, a Geriatric Psychiatry Fellowship, and a Fellowship in Addiction Medicine. There are also research training fellowships in eating disorders, addictions, and neuromodulation. To learn more about the Department of Psychiatry and Behavioral Sciences, please visit: <https://www.psychiatry.umn.edu/>

The University of Minnesota, Twin Cities (UMTC), is among the largest public research universities in the country, offering undergraduate, graduate, and professional students a multitude of opportunities for study and research. Located at the heart of one of the nation's most vibrant, progressive, diverse, and affordable metropolitan communities, students on the campuses in Minneapolis and St. Paul benefit from extensive partnerships with world-renowned health centers, international corporations, government agencies, and arts, nonprofit, and public service organizations.

#### About the Position

The Physician Chief of the Behavioral Health Service Line in the joint clinical enterprise known as M Health Fairview will serve as the academic physician partner in a dyad with a Fairview executive partner. These two individuals will share equal levels of accountability and decision-making authority for all aspects of service line performance across the organization. The dyad will work closely with the Department Chair, community physicians, and other key stakeholders across the system and will focus on quality, safety, patient experience, employee engagement, financial performance, growth, regulatory compliance, strategic planning and capital planning. The Physician Chief, as an academic faculty member, will also represent and advocate for enhanced integration of educational and clinical research programming across the service line. This role embodies the best of bringing academic expertise and vision into real-world clinical care.

#### The Ideal Candidate

The successful candidate will join a strong and growing academic psychiatry practice, with expert multi-disciplinary teams in integrated care, child and adolescent psychiatry, substance use disorders, psychosis, mood, personality disorders. Academic responsibilities include full participation in departmental and interdisciplinary activities including teaching of medical students, residents, and other interprofessional learners. Faculty will have opportunities to participate in scholarly activities including research and publication. Demonstration of clinical excellence and gaining a national reputation for clinical expertise and/or innovations in education/clinical programming is required for professional advancement. The candidate will have a strong commitment to scholarly achievement to support advancement within the institution. Robust mentoring is available for scholarly work, in a variety of disorders and methodologies.

The candidate must be eligible to be licensed in Minnesota and be board-certified or board-eligible. She/he must have significant experience in clinical program-building and medical center leadership roles, preferably within a large integrated health system and/or academic setting.

#### Diversity Statement

The University recognizes and values the importance of diversity and inclusion in enriching the employment experience of its employees and in supporting the academic mission. The University is committed to attracting and retaining employees with varying identities and backgrounds.

*The University of Minnesota provides equal access to and opportunity in its programs, facilities, and employment without regard to race, color, creed, religion, national origin, gender, age, marital status, disability, public assistance status, veteran status, sexual orientation, gender identity, or gender expression.*

To learn more about diversity at the U: <http://diversity.umn.edu>.

# Psychiatrist Inpatient/Outpatient

## WISCONSIN

HealthPartners Medical Group is a top Upper Midwest multispecialty physician practice based in Minnesota and western Wisconsin. Our award-winning Behavioral Health team is 25+ psychiatrists strong and focused in multidisciplinary inpatient and outpatient settings. Together with social workers, nurses, PAs, therapists and OTs, we provide exceptional care to our community and are dedicated to the health and well-being of our patients.

We have an exciting full-time opportunity for a talented and caring BC/BE Psychiatrist to join our group at the Amery Hospital & Clinic (AHC) in beautiful Amery, Wisconsin. This key position provides direct inpatient and outpatient care as part of our psychiatric treatment program at AHC and nearby care sites. Leadership and other practice growth opportunities are available.

AHC is a progressive western Wisconsin community hospital located about an hour east of the Minneapolis/St. Paul metropolitan area. The Amery community offers the variety of a larger city with a sense of hometown hospitality. With an excellent school system and abundant sporting/outdoor/recreational offerings, Amery is an ideal place to put down family and practice roots. For hospital and community information, visit [www.amerymedicalcenter.org](http://www.amerymedicalcenter.org) and [www.amerywisconsin.org](http://www.amerywisconsin.org).

HealthPartners offers a competitive compensation and benefits package, paid malpractice coverage and a rewarding practice environment with support from our Twin Cities-based group. For consideration, please apply online at [healthpartners.com/careers](http://healthpartners.com/careers), forward your CV and cover letter to [lori.m.fake@healthpartners.com](mailto:lori.m.fake@healthpartners.com), or call Lori at 800-472-4695 x1. EOE

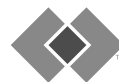

HealthPartners®

# Psychiatrists Professional Liability Insurance

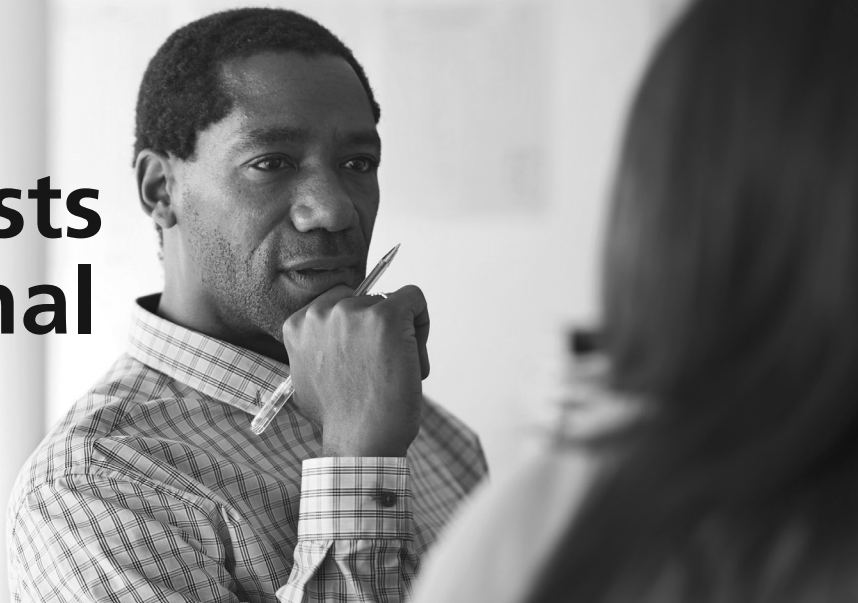

## Discounts Offered Include:

- ✓ **15% NEW POLICYHOLDER DISCOUNT\***  
(must be claims free for the last 6 months)
- ✓ **Up to 50% New Doctor Discount** (for those who qualify)
- ✓ **10% Claims Free Discount** (for those practicing 10 years, after completion of training, and remain claims free)
- ✓ **50% Resident-Fellow Member Discount**
- ✓ **15% Child and Adolescent Psychiatrist Discount** (for those whose patient base is more than 50% children and adolescents)
- ✓ **50% Part-time Discount** (for up to 20 client hours a week or less)
- ✓ **5% Risk Management Discount** (for 3 hours of CME)

*\*Where allowable by law and currently not available in AK or NY.  
(Above Discounts and Coverage Features are subject to individual state approval.)*

**40**  
YEARS

For over 40 years we have provided exceptional protection and have a reputation for outstanding customer service. Our extensive years of experience and industry knowledge allows us to help you by providing worry free coverage so you can concentrate on what you do best – helping people help themselves. When it comes to caring about people, we have a lot in common.

## Our Psychiatrists Professional Liability Program Provides:

- Limits up to \$150,000 in Defense Expenses related to Licensing Board Hearings and other Proceedings
- Up to \$150,000 in Fire Legal Liability Coverage
- Up to \$100,000 in Medical Payments for Bodily Injury
- Up to \$25,000 for First Party Assault and Battery Coverage
- Up to \$25,000 for Information Privacy Coverage (HIPAA)
- Up to \$15,000 in Emergency Aid Coverage
- Insured's Consent to Settle required in the settlement of any claim – No arbitration clause
- Telepsychiatry, ECT, Forensic Psychiatry Coverage
- Risk Management Hotline with 24/7 Service for Emergencies

Visit us at [apamalpractice.com](http://apamalpractice.com) or call **877.740.1777** to learn more.

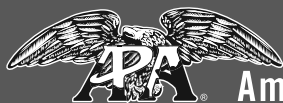

**American Professional Agency**

LEADERS IN PSYCHIATRIC MEDICAL LIABILITY INSURANCE

Endorsed by:

AMERICAN  
PSYCHIATRIC  
ASSOCIATION

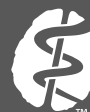

Source: http://ajp.psychiatryonline.org/doi/suppl/10.1176/ajp.2019.176.issue-3/suppl_file/back.pdf
