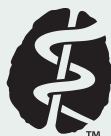

# The American Journal of Psychiatry

Official Journal of the American Psychiatric Association

## Officers 2018–2019

### President

Altha J. Stewart, M.D.

### President-Elect

Bruce J. Schwartz, M.D.

### Treasurer

Gregory W. Dalack, M.D.

### Secretary

Philip R. Muskin, M.D., M.A.

### Assembly

#### Speaker

James R. Batterson, M.D.

#### Speaker-Elect

Paul J. O'Leary, M.D.

#### Recorder

Seeth Vivek, M.D.

### Office of the CEO and Medical Director

#### CEO and Medical Director

Saul Levin, M.D., M.P.A., F.R.C.P.-E.

### Board of Trustees

Renée L. Binder, M.D.

Jenny L. Boyer, M.D., Ph.D., J.D.

Rana Elmaghraby, M.D.

Anita S. Everett, M.D.

Tanuja Gandhi, M.D.

Ayana Jordan, M.D., Ph.D.

Annette M. Matthews, M.D.

Maria A. Oquendo, M.D., Ph.D.

Roger Peele, M.D.

Vivian B. Pender, M.D.

Eric M. Plakun, M.D.

Richard F. Summers, M.D.

Ramaswamy Viswanathan, M.D., D.M.Sc.

Cheryl D. Wills, M.D.

Melinda Young, M.D.

## Editorial Board

### Editor-in-Chief

Ned H. Kalin, M.D.

### Deputy Editors

Elisabeth Binder, M.D., Ph.D.

Kathleen T. Brady, M.D., Ph.D.

David A. Lewis, M.D.

Daniel S. Pine, M.D.

Carolyn Rodriguez, M.D., Ph.D.

Madhukar Trivedi, M.D.

### Associate Editors

Huda Akil, Ph.D.

Melissa Arbuckle, M.D., Ph.D.

Alan Brown, M.D., M.P.H.

Tyrone Cannon, Ph.D.

Karl Deisseroth, M.D., Ph.D.

Benjamin G. Druss, M.D., M.P.H.

Felton Earls, M.D.

Graham J. Emslie, M.D.

Javier I. Escobar, M.D., M.Sc.

Julie L. Fudge, M.D.

Qiyong Gong, M.D., Ph.D.

Helena Hansen, M.D., Ph.D.

Yasmin Hurd, Ph.D.

Clinton D. Kilts, Ph.D.

Carlos López Jaramillo, M.D., M.Sc.,  
Ph.D.

Joan L. Luby, M.D.

Constantine G. Lyketsos, M.D., M.H.S.

Helen S. Mayberg, M.D., F.R.C.P.C.

Terrie E. Moffitt, Ph.D.

Rajesh Narendran, M.D.

Charles B. Nemeroff, M.D., Ph.D.

Roy Perlis, M.D.

Bryan L. Roth, M.D., Ph.D.

Alan F. Schatzberg, M.D.

Anita Thapar, M.B.B.Ch., F.R.C.Psych.,  
Ph.D., F.Med.Sci.

Mauricio Tohen, M.D., Dr.PH., M.B.A.

Giulio Tononi, M.D., Ph.D.

Eduard Vieta, M.D., Ph.D.

John T. Walkup, M.D.

### Editors Emeriti

Nancy C. Andreasen, M.D., Ph.D.

Robert Freedman, M.D.

### Former Editors

Amariah Brigham, M.D., 1844–1849

T. Romeyn Beck, M.D., 1849–1854

John P. Gray, M.D., 1854–1886

G. Alder Blumer, M.D., 1886–1894

Richard Dewey, M.D., 1894–1897

Henry M. Hurd, M.D., 1897–1904

Edward N. Brush, M.D., 1904–1931

Clarence B. Farrar, M.D., 1931–1965

Francis J. Braceland, M.D., 1965–1978

John C. Nemiah, M.D., 1978–1993

### Editorial Staff

#### Executive Editor

Michael D. Roy

#### Senior Editor

John J. Guardiano, Ph.D.

#### Production Manager

Susan Westrate

#### Staff Editors

Angela Moore

Rachel Schaperow

#### Online Content Manager

Michael Pogachar

#### Editorial Support Services Manager

Heidi Koch

#### Editorial Assistant

Linda LaCour

#### Editorial Assistant/ Permissions Coordinator

Efrem Tuquabo

#### Spanish Content Manager

Sergi Casals, M.A.

### Publisher

John McDuffie

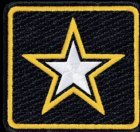

U.S. ARMY

## USE YOUR SKILLS TO HEAL AS A U.S. ARMY PSYCHIATRIST

Provide care that makes a difference to our Soldiers and their families. As a psychiatrist on the U.S. Army or Army Reserve health care team, you'll practice in a collaborative environment, with no overhead or concerns about malpractice insurance. You may be eligible for a bonus, a full-tuition scholarship with a monthly stipend of more than \$2,200, specialized training assistance or qualify for an education loan repayment program. If you decide to serve in the Army Reserve, you may continue to work in your community and serve when needed.

For more information about a career in Army Medicine, visit [healthcare.goarmy.com/oa18](https://healthcare.goarmy.com/oa18)

## Department of Psychiatry

With the continued growth of our Department of Psychiatry and our New General Psychiatry Residency Programs at Ocean Medical Center and Jersey Shore University Medical Center our vision for Behavioral Health is Bright.

**Hackensack Meridian Health** is a leading not-for-profit health care network in New Jersey offering a complete range of medical services, innovative research, and life enhancing care aiming to serve as a national model for changing and simplifying health care delivery through partnerships with innovative companies and focusing on quality and safety.

Through a partnership between Hackensack Meridian Health and Seton Hall University, the School of Medicine will re-define graduate medical education, research, and clinical practice; reverse the critical physician shortage in both the New York/New Jersey metropolitan area and the nation; and stimulate economic development in northern New Jersey.

The School of Medicine will be the anchor in the development of a comprehensive health sciences campus that will also include research facilities and biotechnology endeavors – all in service of educating tomorrow's doctors, discovering novel therapies, and facilitating compassionate and effective healthcare that will meet the ever-changing needs of tomorrow's patients.

The School of Medicine will be the cornerstone of a dynamic venue for the exchange of ideas, the development of healthcare and research thought leaders and practitioners, and the discovery of novel therapies to meet the medical challenges of the future.

"Ocean Medical Center's psychiatry program will be a community-based program," said Ramon Solkhah, M.D., program director for psychiatry as well as founding Chair of Psychiatry & Behavioral Health at the Hackensack Meridian School of Medicine at Seton Hall University. "Our new psychiatry residency program will improve clinical care and ultimately encourage future health care leaders to build practices in the Jersey Shore area."

As the area's premier provider of psychiatric services, **Hackensack Meridian Behavioral Health Services** has provided comprehensive mental health and substance abuse services to the residents of Monmouth, Ocean, Middlesex, and Bergen Counties for over forty years. Due to continued growth and expansion, we are currently accepting applications for Psychiatrists to join our Mental Health and Addiction Interdisciplinary Teams in the following positions:

- Medical Director/Section Chief, Child & Adolescent Psychiatry: Jersey Shore University Medical Center (Neptune, NJ)
- Outpatient Child & Adolescent Psychiatrist: Jersey Shore University Medical Center (Neptune, NJ) and Hackensack University Medical Center (Hackensack, NJ)
- Consultation Liaison Psychiatrists: Jersey Shore University Medical Center (Neptune, NJ) and Riverview Medical Center (Red Bank, NJ) and Hackensack University Medical Center (Hackensack, NJ)
- Staff Psychiatrist for Adult Inpatient Unit: Jersey Shore University Medical Center (Neptune, NJ) and Riverview Medical Center (Red Bank, NJ) and Hackensack University Medical Center (Hackensack, NJ)
- Outpatient General Psychiatrist: Jersey Shore University Medical Center (Neptune, NJ), Riverview Medical Center (Red Bank, NJ), and Raritan Bay Medical Center (Perth Amboy, NJ)
- Medical Director of Adult Inpatient Unit Riverview (Red Bank, NJ)
- Emergency Psychiatry: Raritan Bay Medical Center (Perth Amboy, NJ)
- Geriatric Psychiatry – Hackensack University Medical Center (Hackensack, NJ)

In addition to our collegial work environment, we offer a highly competitive compensation package which includes: medical/dental plans, 403(b) retirement plan, and relocation assistance. **For immediate consideration, please contact Renee Theobald, at: [Renee.Theobald@hackensackmeridian.org](mailto:Renee.Theobald@hackensackmeridian.org) or call: 732 751-3597**

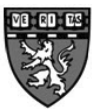

### Director of Psychiatric Brain Stimulation

BRIGHAM AND WOMEN'S HOSPITAL

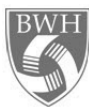

#### Department of Psychiatry

The Brigham and Women's Hospital Department of Psychiatry is conducting a nation-wide search for a Director of Psychiatric Brain Stimulation. This individual should have a demonstrated record of innovative research, significant scholarship, clinical expertise, and educational skills. A strong record of national leadership in the field of psychiatric brain stimulation and somatic therapies is also required.

The Brigham and Women's Hospital Department of Psychiatry is a large and inter-disciplinary, academic department with substantial clinical, research and educational missions. It includes particular expertise in neuropsychiatry, medical psychiatry, and investigational and clinical therapies.

Academic appointment at Harvard Medical School at the rank of Associate Professor or Professor will be commensurate with experience, training and level of accomplishment.

If interested, please send your CV to:

**Arthur J. Barsky, M.D., Vice Chair for Academic Affairs**  
 Department of Psychiatry, Brigham and Women's Hospital  
 60 Fenwood Rd, Boston, MA 02115  
[abarsky@bwh.harvard.edu](mailto:abarsky@bwh.harvard.edu)

#### Employment Conditions:

<https://www.partners.org/For-Medical-Professionals/Employment-Conditions.aspx>

#### EEO Statement

Brigham and Women's Physicians Organization and Harvard Medical School is an equal opportunity employer and all qualified applicants will receive consideration for employment without regard to race, color, religion, sex, sexual orientation, gender identity, national origin, disability status, protected veteran status, pregnancy and pregnancy-related conditions or any other characteristic protected by law.

## Join the family

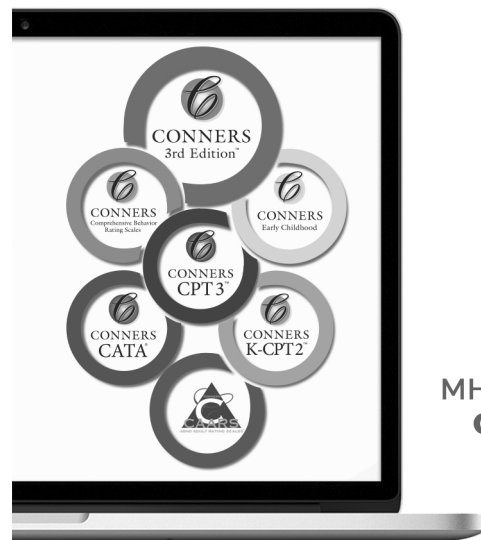

**MHS**  
 ASSESSMENTS

[MHS.com/Conners](http://MHS.com/Conners)

### Trust in the Conners family to provide:

- **Easy online assessment** that includes scoring and three detailed, visual report options at no additional cost
- **Improve the impact of your intervention** and treatment strategies by identifying specific challenge areas to work on
- **Reliable instruments** developed with highly representative normative samples and strong psychometric properties

Published on behalf of the  
**Royal College of Psychiatrists**

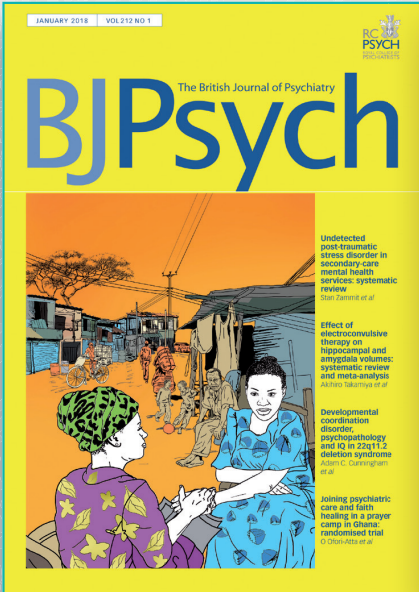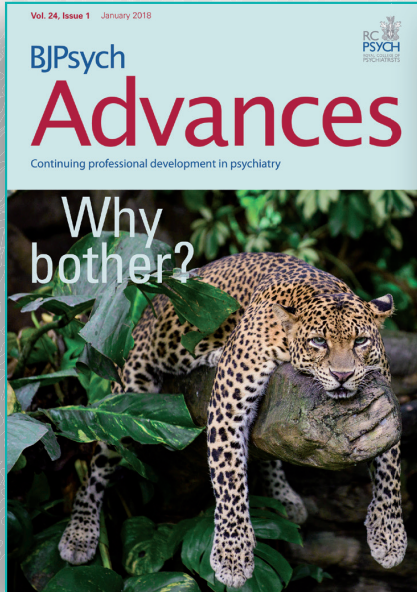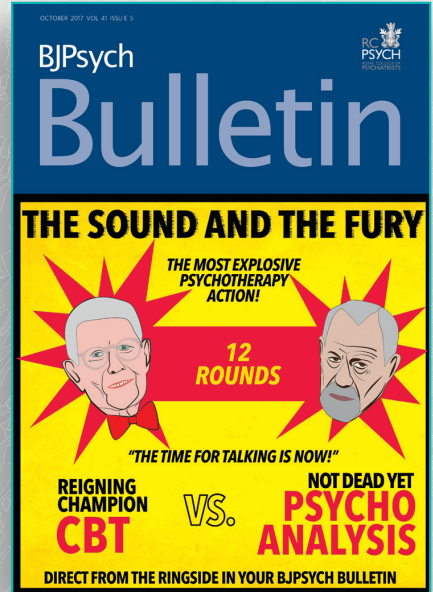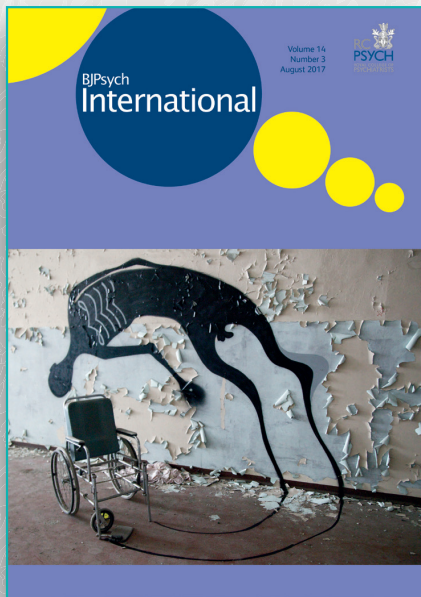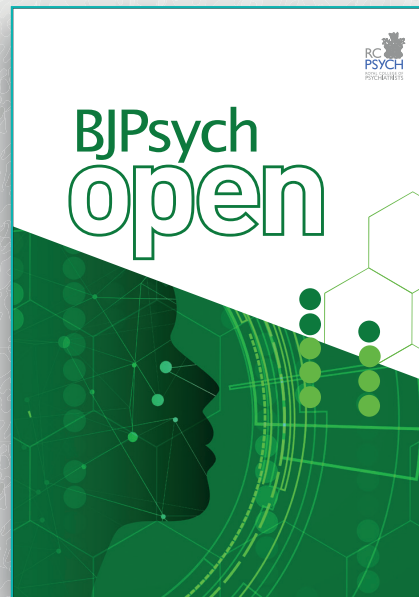

# The American Journal of Psychiatry

## Residents' Journal

[ajp.psychiatryonline.org/loi/ajp-rj](http://ajp.psychiatryonline.org/loi/ajp-rj)

### February 2019

**2 Advocating for Underrepresented Applicants to Psychiatry: Perspectives on Recruitment**

Elon E. Richman, M.D., Benson S. Ku, M.D., and Alexander G. Cole, M.D.

*Assessing historical perspectives, disparities, and next steps*

**5 Depression: What's Buprenorphine Got to Do With It?**

Sean Lynch, B.A., and Ori-Michael Benhamou, M.D.

*Examining treatment for co-occurring substance use and mood disorders*

**8 Valproate Monitoring in Patients With Hypoalbuminemia**

Stephanie Han, M.D.

*Analyzing pharmacology, side effects, and acid toxicity*

**10 An Interview With Charles Sophy, D.O.**

Oliver Glass, M.D.

*Discussing work-life balance while working with celebrity clients*

**12 Call for Applications to Join the 2019 Editorial Board**

**13 Residents' Resources**

**14 Information for Authors**

**The Residents' Journal** is an e-publication that serves as a forum for sharing ideas and experiences in training, clinical practice, research, and careers.

**The Residents' Journal** considers manuscripts authored by medical students, resident physicians, and fellows. For information about submitting manuscripts, visit the **Author Resources** page online: [https://ajp.psychiatryonline.org/residents\\_journal/rj\\_ifora](https://ajp.psychiatryonline.org/residents_journal/rj_ifora).

### 2018–2019 Editorial Board

**Editor-in-Chief:** Oliver Glass, M.D.

**Senior Deputy Editor:** Shapir Rosenberg, M.D.

**Deputy Editor:** Matthew Edwards, M.D.

**Deputy Editor:** Anna Kim, M.D.

**Deputy Editor/Podcast Editor:**  
Lindsay Lebin, M.D.

**Associate Editors:** Carol Chan, M.D.

Alexander Cole, M.D.

Jason Garner, M.D., J.D.

David Latov, M.D.

Elon Richman, M.D.

**Culture Editor:** Erik Bayona, M.D.

**Culture Editor/Social Media Editor:**  
Somya Abubucker, M.D.

### CALL FOR PAPERS

All article types are welcome; all submissions will be peer reviewed.

To submit an article, go to <https://mc.manuscriptcentral.com/appi-ajp>, and select a manuscript type for AJP Residents' Journal.

 [Facebook.com/AJPResidentsJournal](https://www.facebook.com/AJPResidentsJournal)

 [@AJP\\_ResJournal](https://twitter.com/AJP_ResJournal)

AMERICAN  
PSYCHIATRIC  
ASSOCIATION

PUBLISHING

[www.appi.org](http://www.appi.org)

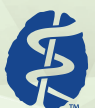

# Go Online

Visit [ajp.psychiatryonline.org](http://ajp.psychiatryonline.org) for these features!

## **AJP in Advance** *Discover the latest research advances before they appear in print*

### **Doubly Randomized Preference Trial of Prolonged Exposure Versus Sertraline for Treatment of PTSD**

Prolonged exposure, as part of cognitive behavioral therapy, and selective serotonin reuptake inhibitors (SSRIs) represent established treatments for posttraumatic stress disorder (PTSD). The authors examine the degree to which a patient's preference for one of these therapies impacts treatment response. They use a creative design to show that patient choice impacts on response to treatment, at least partially through adherence.

### **Cerebellar-Prefrontal Network Connectivity and Negative Symptoms in Schizophrenia**

The authors first examined perturbations in resting-state functional magnetic resonance imaging connectivity as they relate to negative symptoms in patients with schizophrenia, then used this information to provide a brain-based target for transcranial magnetic stimulation. The findings highlighted dysfunction in a neural circuit connecting the prefrontal cortex to the cerebellum.

## **AJP CME** *Earn CME credit: 3 courses per issue*

This month's courses appear on pages 253–256.

Each short course is based on one article in this issue and can earn up to 1 *AMA PRA Category 1 Credit™*. CME credit is issued only **online**, and a paid subscription to AJP's CME course program is required.

Visit [psychiatryonline.org/cme](http://psychiatryonline.org/cme) and click on the "American Journal of Psychiatry" tab.

## **AJP Multimedia** *Access Audio or Video for highlights of each issue*

In AJP Audio this month, Executive Editor Michael Roy speaks with Leah S. Richmond-Rakerd, Ph.D., about her research on the antecedents, clinical features, and life characteristics of adolescents who engage in both self-harming and violent criminal behaviors.

In this month's video, Deputy Editor Daniel S. Pine, M.D., discusses the articles "Age-Associated Deviations of Amygdala Functional Connectivity in Youths With Psychosis Spectrum Disorders: Relevance to Psychotic Symptoms" and "A Contagion Model for Within-Family Transmission of Drug Abuse."

## **History of Psychiatry** *Revisit the field's rich history through the AJP Archive*

### **25 Years Ago This Month: Panic Data**

William W. Eaton and colleagues present the first data on panic attacks and panic disorder in a large sample representative of the U.S. population in a paper that went on to be highly cited, including referenced in a 2013 patent application.

Psychiatry Online

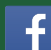

@AmJPsychiatry

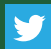

AMERICAN  
PSYCHIATRIC  
ASSOCIATION  
PUBLISHING

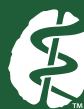

[www.appi.org](http://www.appi.org)  
1-800-368-5777  
[appi@psych.org](mailto:appi@psych.org)
