# The American Journal of Psychiatry

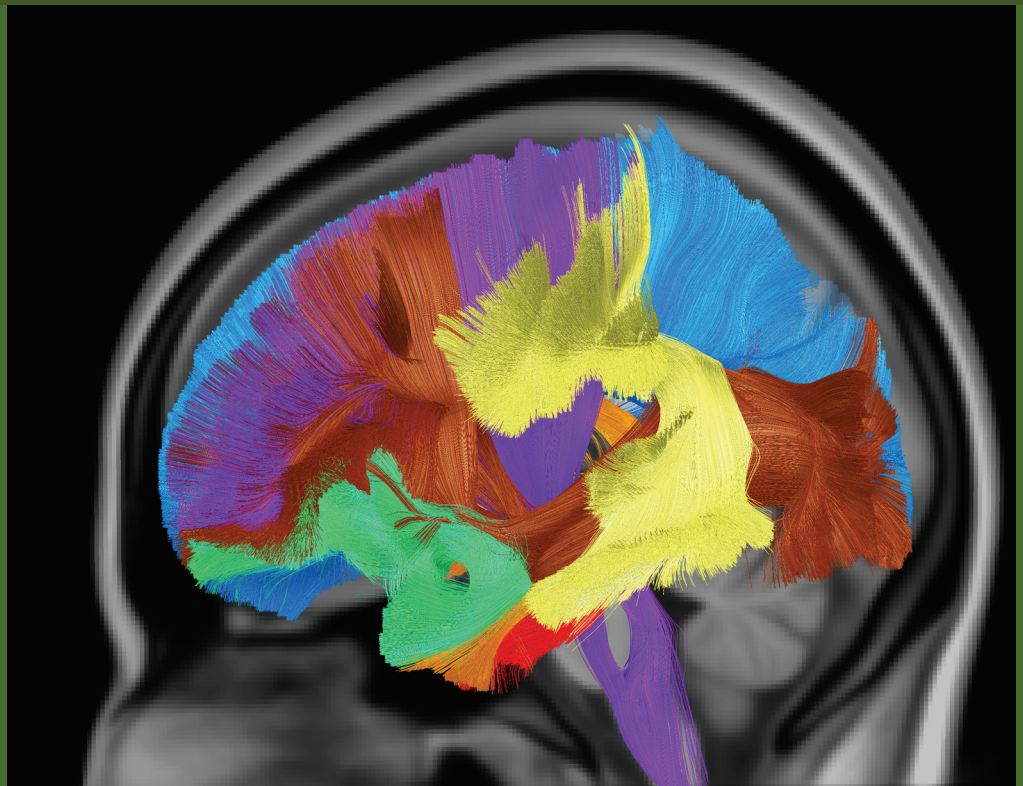

Translating Developmental Neuroscience to Understand Risk  
for Psychiatric Disorders

Adolescents Who Self-Harm and Commit Violent Crime: Testing  
Early-Life Predictors of Dual Harm in a Longitudinal Cohort Study

Age-Associated Deviations of Amygdala Functional Connectivity  
in Youths With Psychosis Spectrum Disorders

Altered Uncinate Fasciculus Microstructure in Childhood  
Anxiety Disorders in Boys But Not Girls
